# Supplementary material for: Systemic administration of a TLR7 agonist attenuates regulatory T cells by dendritic cell modification and overcomes resistance to PD-L1 blockade therapy
Source: PubMed Central journal article supplement (PMC5862579; doi:10.18632/oncotarget.24327), 2018-01-27
Supplement: oncotarget-09-13301-s001.pdf [file oncotarget-09-13301-s001.pdf]

## Systemic administration of a TLR7 agonist attenuates regulatory T cells by dendritic cell modification and overcomes resistance to PD-L1 blockade therapy

### SUPPLEMENTARY MATERIALS

#### Stimulation of DCs by resiquimod *in vitro*

In a preliminary experiment, a suitable dose of resiquimod that induce activation of DCs *in vitro* was selected. Non-depleted- and pDC-depleted splenocytes from C3H mice were stimulated in the presence or absence of resiquimod (0.1  $\mu\text{g}/\text{ml}$ ) and expression of IL-12 on PDCA-1<sup>+</sup>CD11c<sup>+</sup> cDCs was analyzed at 12 hr. For depleting pDCs, negative selection was performed by using anti-PDCA-1 MicroBeads (Miltenyi Biotec, San Diego, CA).

#### Generation of tregs by co-culture with Ag-pulsed DCs and DO11.10 CD4<sup>+</sup> T cells

DCs were isolated from BALB/c splenocytes by using Pan DC MicroBeads (Miltenyi Biotec). Isolated DCs

( $2 \times 10^5$  cells/well) were pre-cultured in the presence of OVA (10  $\mu\text{g}/\text{ml}$ ) and TNF- $\alpha$  (10 ng/ml) with or without resiquimod (0.1  $\mu\text{g}/\text{ml}$ ) in a 48 well plate for 18 hr. DO11.10 TCR CD4<sup>+</sup> T cells from RAG2<sup>-/-</sup> DO11.10 mice were negatively isolated using a BD IMag-DM system (BD Biosciences), and then isolated cells were labeled with violet tracker (CellTrace Violet Cell proliferation Kit, Invitrogen, Carlsbad, CA). Violet labeled DO11.10 CD4<sup>+</sup> T cells ( $1 \times 10^6$  cells/well) were added to the well of OVA-pulsed DCs, and co-cultured for 3 days. Cultured cells were stained and analyzed by flow cytometry.

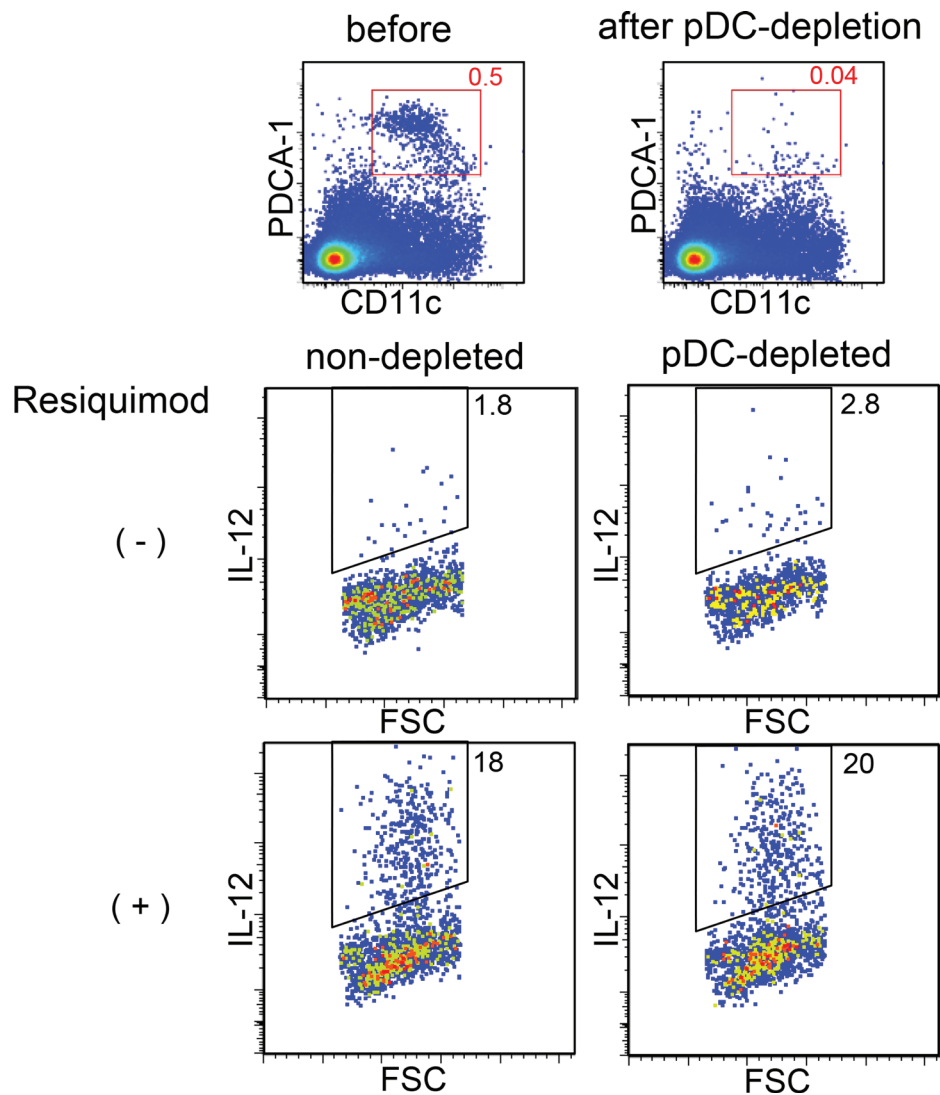

**Supplementary Figure 1: Non-depleted and pDC-depleted splenic cDCs comparably induce IL-12 expression after resiquimod stimulation.** Non-depleted and pDC-depleted splenocytes were cultured for 12 hr with or without resiquimod. IL-12 expression was measured. Upper two panels show CD11c and PDCA-1 expression in whole and pDC-depleted splenocytes before culture. An electronic gate was placed on PDCA-1<sup>-</sup>CD11c<sup>+</sup> cDCs, and then IL-12 expression and forward scatter (FSC) profiles are displayed as dotted plots. Values are the percentages of IL-12<sup>+</sup> cells.

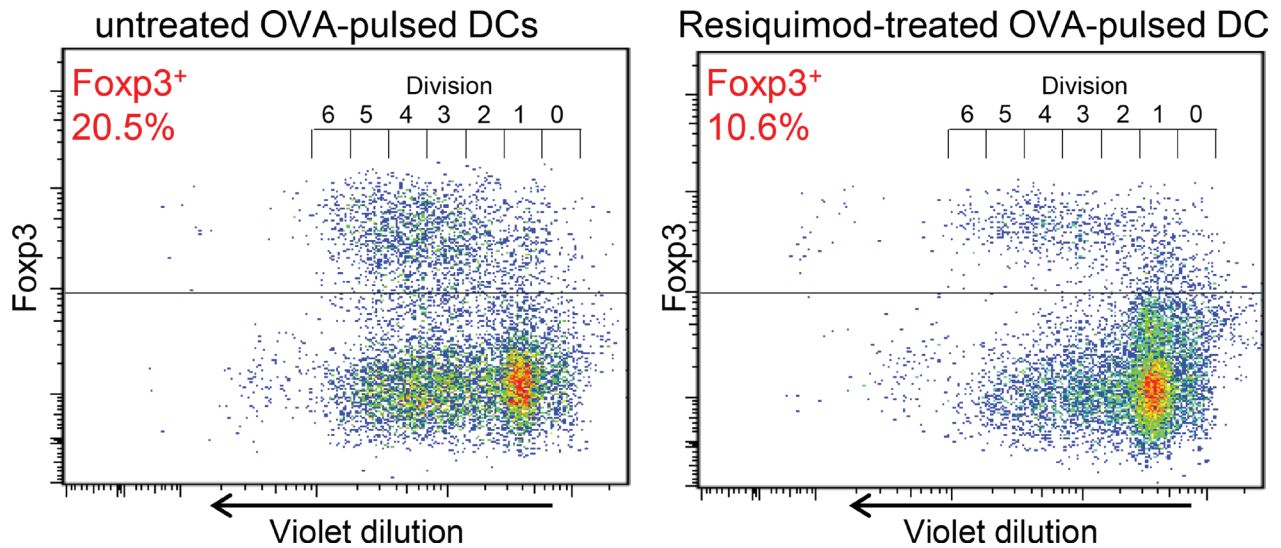

**Supplementary Figure 2: Resiquimod-treated DCs inhibit generation of induced Tregs.** Violet-labeled DO11.10 CD4<sup>+</sup> T cells were co-cultured with untreated or resiquimod-treated OVA-pulsed mature splenic DCs as described in Supplementary Materials and Methods. Cells were stained and analyzed after 3 day culture. An electronic gate was placed on CD4<sup>+</sup>CD3<sup>+</sup> alive lymphocytes and then Fopx3 expression and violet dilution are displayed as dotted plots. Values are the percentages of Fopx3<sup>+</sup> cells within CD4<sup>+</sup> T cells.

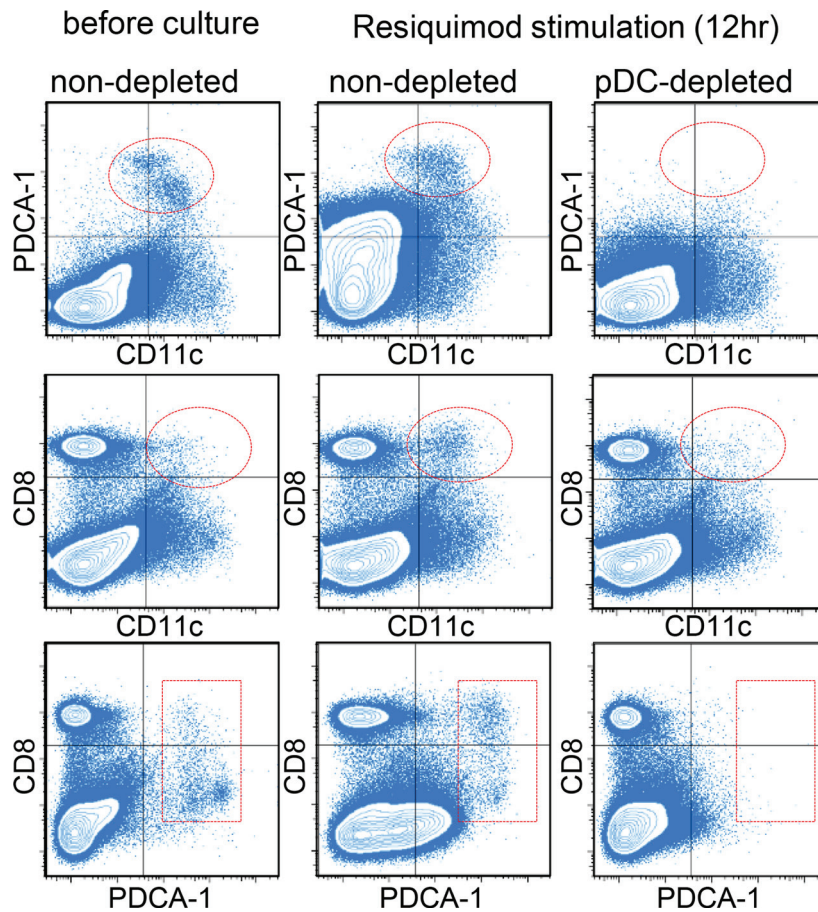

**Supplementary Figure 3: Resiquimod stimulation increases CD8<sup>+</sup>PDCA-1<sup>+</sup> DCs.** Non-depleted and pDC-depleted splenocytes were cultured in the presence of resiquimod (0.1 µg/ml) for 12 hr. Cells were stained and analyzed by flow cytometry. Expression profiles of CD11c, PDCA-1, and CD8 in alive cells are displayed as dotted plots.

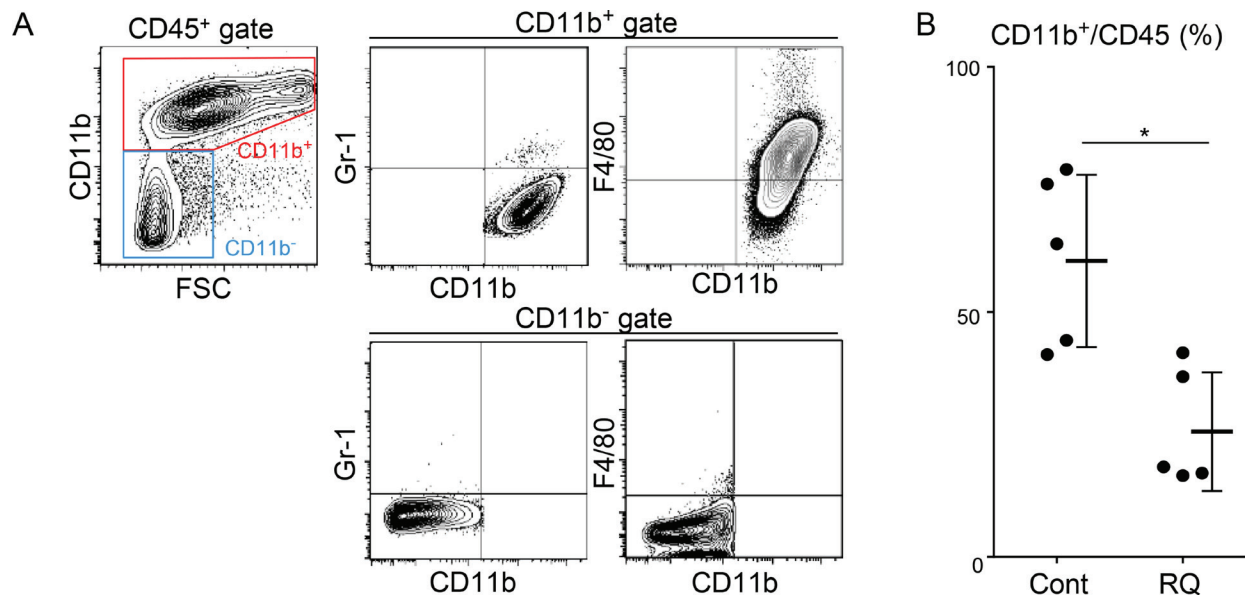

**Supplementary Figure 4: CD11b<sup>+</sup> cells are Gr-1-negative and F4/80-positive, and resiquimod treatment decreases the proportion of CD11b<sup>+</sup> cells.** SCCVII tumor cells were inoculated and mice were treated as described in Figure 2. TIL fractions at day 19 were stained with FITC-anti-CD45, PE-anti-CD11b, APC-anti-F4/80 and V450-anti-Gr-1 mAbs. Flow cytometric profiles in the indicated cell gate are presented as contour plots in (A). The proportion of CD11b<sup>+</sup> cells within CD45<sup>+</sup> cells was analyzed in (B). The bars show the mean values  $\pm$  SD. \*Statistically different ( $p < 0.05$ ).
